# Supplementary material for: Rapid Evaluation of Antibody Fragment Endocytosis for Antibody Fragment–Drug Conjugates
Source: PubMed Central journal article supplement (PMC7355425; doi:10.3390/biom10060955), 2020-06-25
Supplement: biomolecules-10-00955-s001.pdf [file biomolecules-10-00955-s001.pdf]

**Supplementary Material**
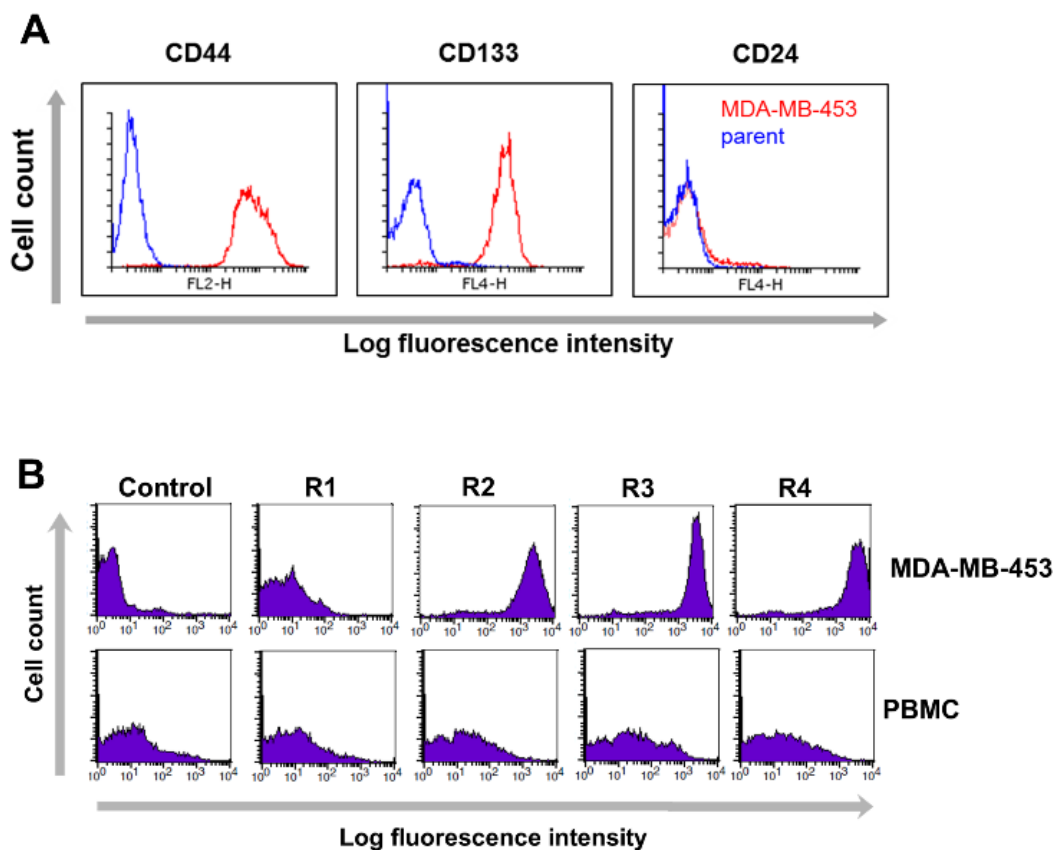

**Figure S1.** Flow cytometric analysis of scFv-phage clones panned against CSC-like MDA-MB-453 cells. **(A)** Surface molecular phenotype CD44<sup>high</sup>, CD133<sup>high</sup> and CD24<sup>low</sup> of CSC-like MDA-MB-453 (MDA-MB-453) and parental MDA-MB-453 (parent) cells were confirmed. Cells were stained with PE- conjugated anti-CD44 antibody (Biogems), APC conjugated anti-CD24 antibody (Biolegend), or anti-CD133 antibody (Miltenybiotec) with Alexa Fluor® 647 conjugated secondary antibody (Jackson Immunoresearch). **(B)** Flow cytometric analysis of successive rounds of panning of scFv-phage antibodies against CSC-like MDA-MB-453 cells (positive control cell). Enrichment of phage antibodies for proteins in MDA-MB-453 is observed compared to PBMC (negative control cell). Antibodies were detected with mouse anti-M13 phage antibody and Alexa Fluor® 647 conjugated secondary antibody. PBMC was used as a negative control.

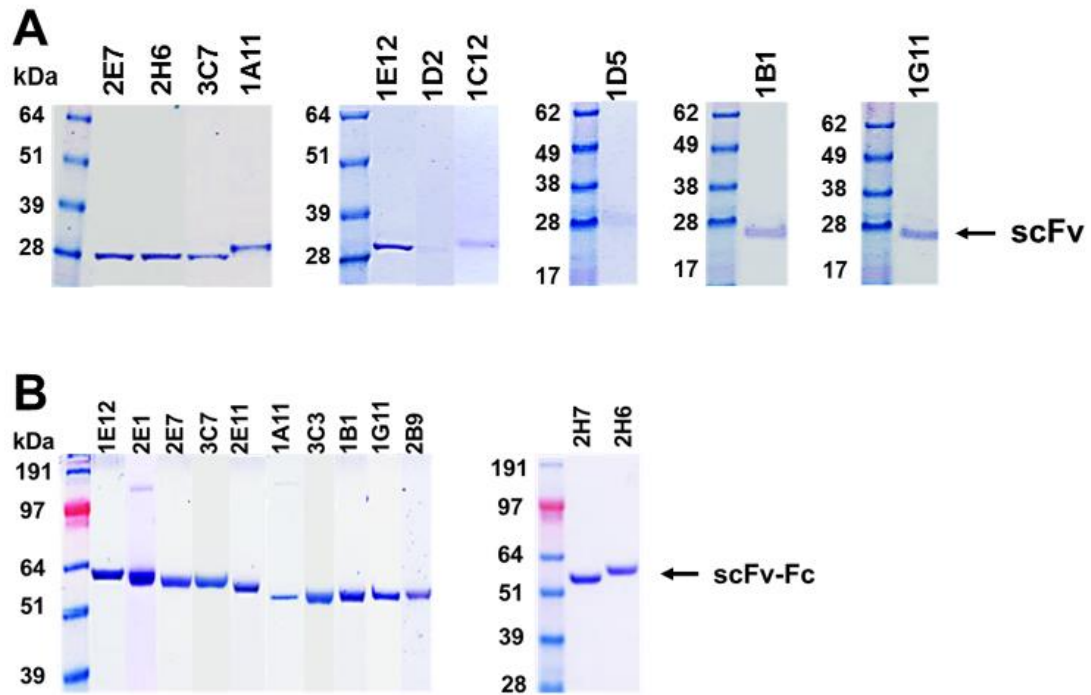

**Figure S2.** SDS-PAGE analysis of (A) scFv and (B) scFv-Fc antibody fragments. Purified monoclonal scFvs and scFv-Fc Abs were used to analyzed endocytosis into CSC-like MDA-MB-453 cells. Antibodies were resolved on 4-12% (w/v) Bis-Tris SDS-PAGE under reducing condition. Protein bands were visualized by staining with Coomassie Brilliant blue. The arrows indicate the expected molecular weight of scFv and scFv-Fc fragments.

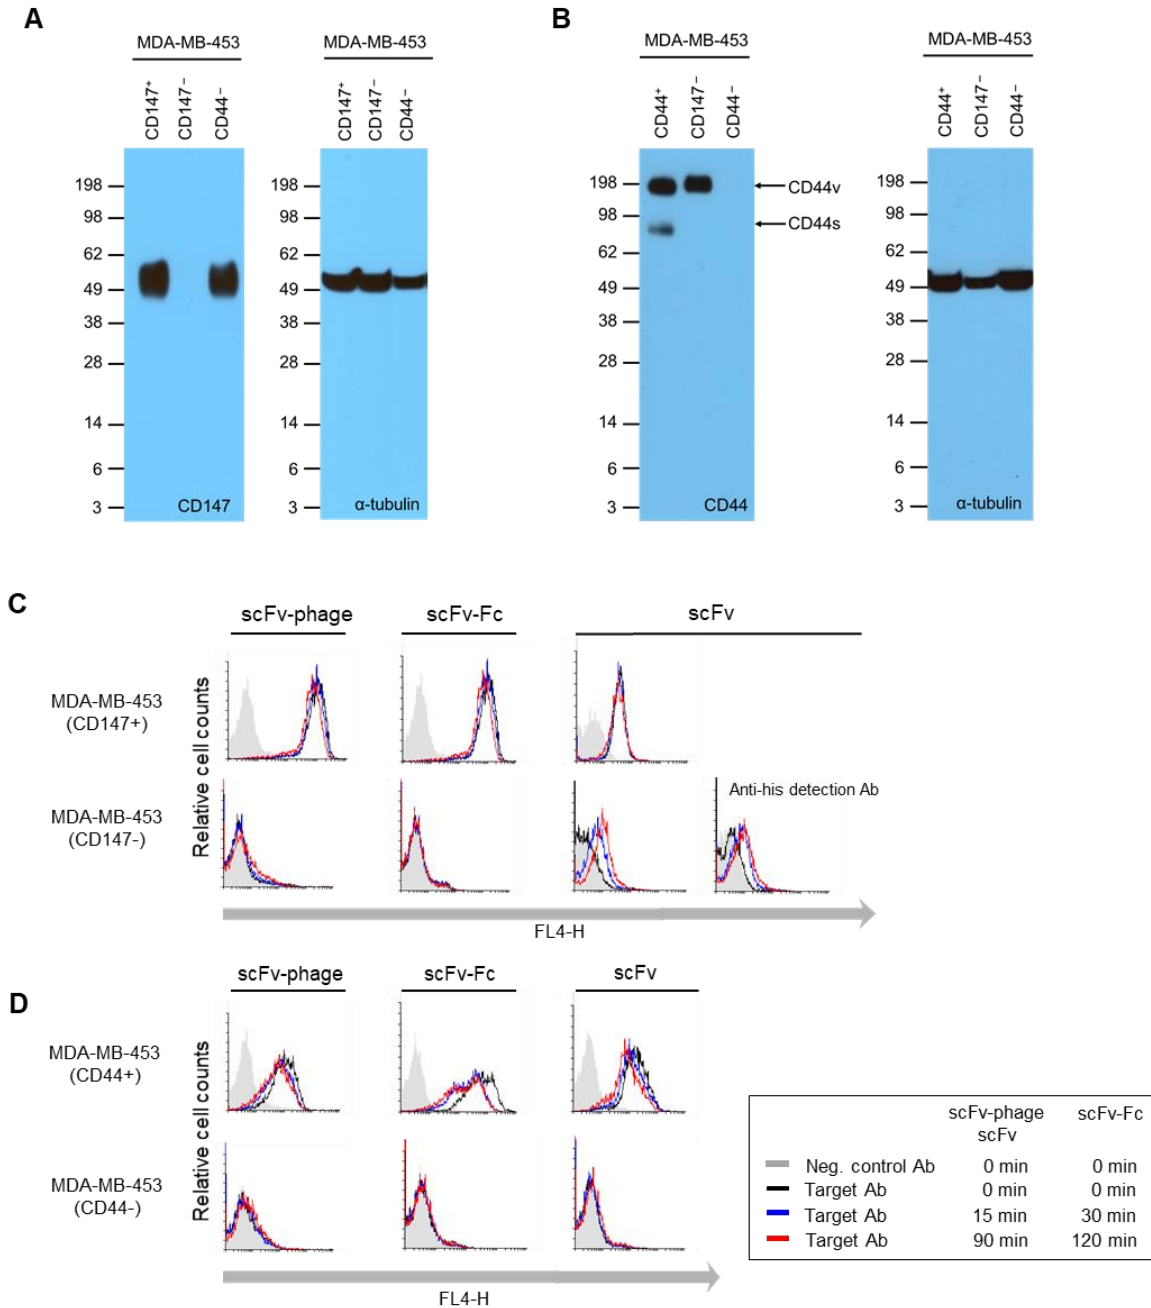

**Figure S3.** scFv-phage, scFv and scFv-Fc antibodies are taken up by antigen-positive MDA-MB-453 cell lines, but not in the antigen-negative cell lines. Western blot analysis of **(A)** CD147 and **(B)** CD44 expression in CD147<sup>-</sup> or CD44<sup>-</sup> MDA-MB-453 cell lines. The protein gene for CD147 or CD44 was knocked-out by CRISPR/Cas9 gene-editing system. Sonicated whole-cell lysates were prepared in ice-cold cell lysis buffer containing 25 mM Tris-HCl, pH 7.4, 150 mM NaCl, 5 mM EDTA, 1 mM PMSF, 1 µg/mL aprotinin, 1 µg/mL leupeptin, and 0.5% TritonX-100. The concentration of total soluble protein in lysates was determined using the BCA Protein Assay Kit (Pierce). Equal amounts of cell lysates from CD147<sup>+</sup> (MDA-MB-453/CD147<sup>+</sup>/CD44<sup>+</sup>), CD147<sup>-</sup> (MDA-MB-453/CD147<sup>-</sup>/CD44<sup>+</sup>), CD44<sup>-</sup> (MDA-MB-453/CD147<sup>+</sup>/CD44<sup>-</sup>), and CD44<sup>+</sup> (MDA-MB-453/CD147<sup>+</sup>/CD44<sup>+</sup>) were resolved by SDS-PAGE under reducing conditions, and α-tubulin was used as a loading control. CD147 and CD44 protein expression were detected with anti-CD147 Ab (clone 2B9) and CD44 Ab (clone 3C7), respectively, followed by HRP-conjugated secondary antibody (Jackson ImmunoResearch), and by reference to pre-stained molecular weight standard markers. Immunoblots were visualized with the enhanced chemiluminescence detection system (Pierce) and exposed to X-ray film. Validation of 2B9 and 3C7 antibody specificity for CD147 and CD44, respectively, using antigen-negative cell lines are shown in

Figure 2C-D in the main manuscript. **(C)** CD147 Ab (clone 2B9) and **(D)** CD44 Ab (clone 3C7) internalization were analyzed at the indicated times by flow-based internalization assay. Histograms for 2B9 and 3C7 are shown as representatives for the antibodies that analyzed as described in the main manuscript. 2B9 scFv lacks binding to CD147 knocked-out cell line, but the background signal was observed by anti-His detection Ab. The filled gray histograms represent the staining of negative controls scFv-phage, scFv or human IgG for scFv-phage and scFv and scFv-Fc, respectively. Antibodies were used in the following concentrations scFv-phage ( $1 \times 10^9$  cfu), scFv ( $1.25 \mu\text{g}/\text{mL}$ ) and scFv-Fc ( $1.25 \mu\text{g}/\text{mL}$ ).

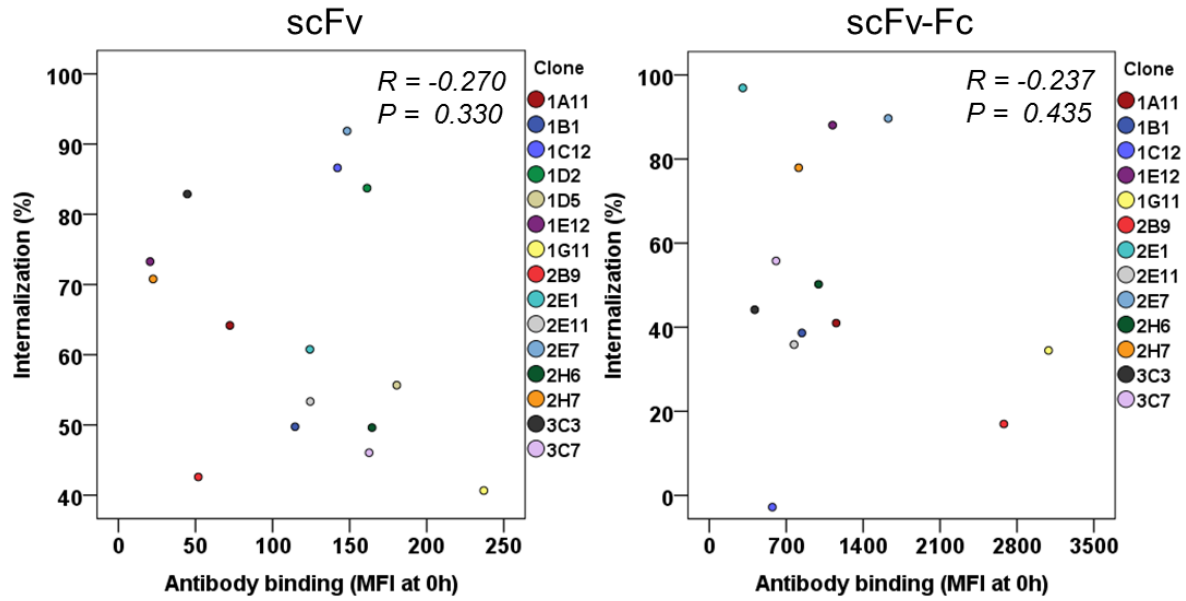

**Figure S4.** Comparative internalization analysis of MDA-MB-453 binding scFv and scFv-Fc antibodies. Analysis of Pearson's correlation between the internalization (1.5 hr at 37 °C) and MFI of Ab binding to MDA-MB-453 before Abs are allowed for endocytosis, which sets the 100% mark for each Ab (0 hr). The calculated correlation coefficient and P value are also included. See the main text for details.

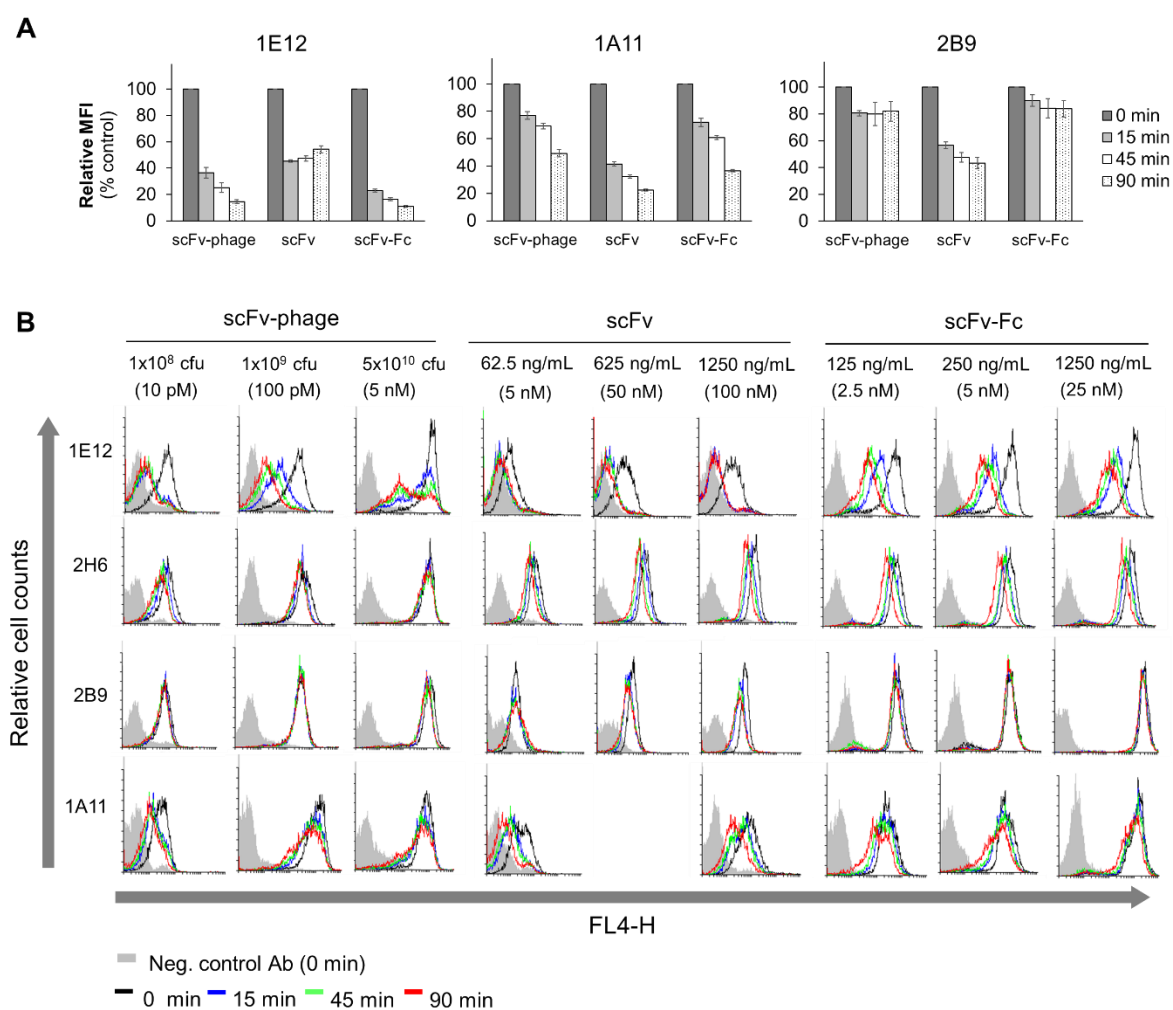

**Figure S5.** Comparison of scFv-phage, scFv and scFv-Fc internalization into MDA-MB-453. **(A)** 1E12, 1A11, and 2B9 antibody internalization were analyzed at the indicated times by flow-based internalization assay. All forms of antibodies were used at the final concentration of 5 nM for the analysis. Values represent geometric mean  $\pm$  SD from triplicates. **(B)** Histograms for 1E12, 2H6, 1A11, and 2B9 internalization in scFv-phage, scFv and scFv-Fc form, as the representatives for the panel of antibodies analyzed as described in the manuscript. The filled gray histograms represent the staining of negative controls scFv-phage, scFv or human IgG for scFv-phage and scFv and scFv-Fc, respectively.

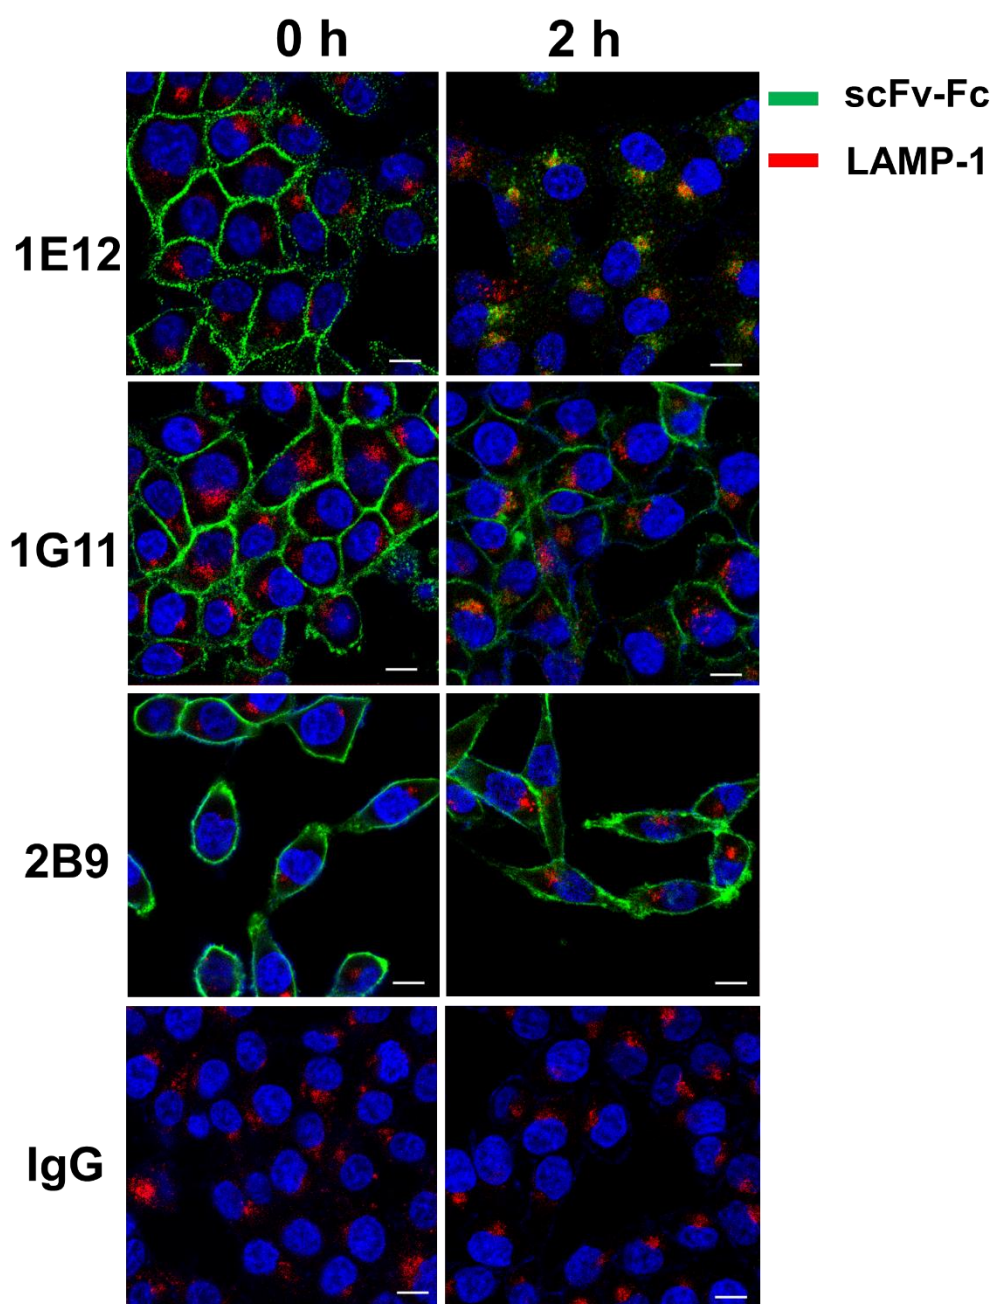

**Figure S6.** Representative zoomed out images of scFv-Fc internalization into MDA-MB-453 cells. 1E12 (HIG), 1G11 (LIG), and 2B9 (LIG) scFv-Fc internalization was analyzed by confocal fluorescence microscopy. MDA-MB-453 cells incubated with 10  $\mu\text{g}/\text{mL}$  scFv-Fc (green) for 1 hr at 4  $^{\circ}\text{C}$  were allowed to internalize for 2 hr at 37  $^{\circ}\text{C}$ . Lysosomes and nuclei were labeled with LAMP-1 (red) and DAPI (blue), respectively. All images were observed with Zeiss LSM 880 confocal microscope with objective 40x; scale bar, 10  $\mu\text{m}$ .

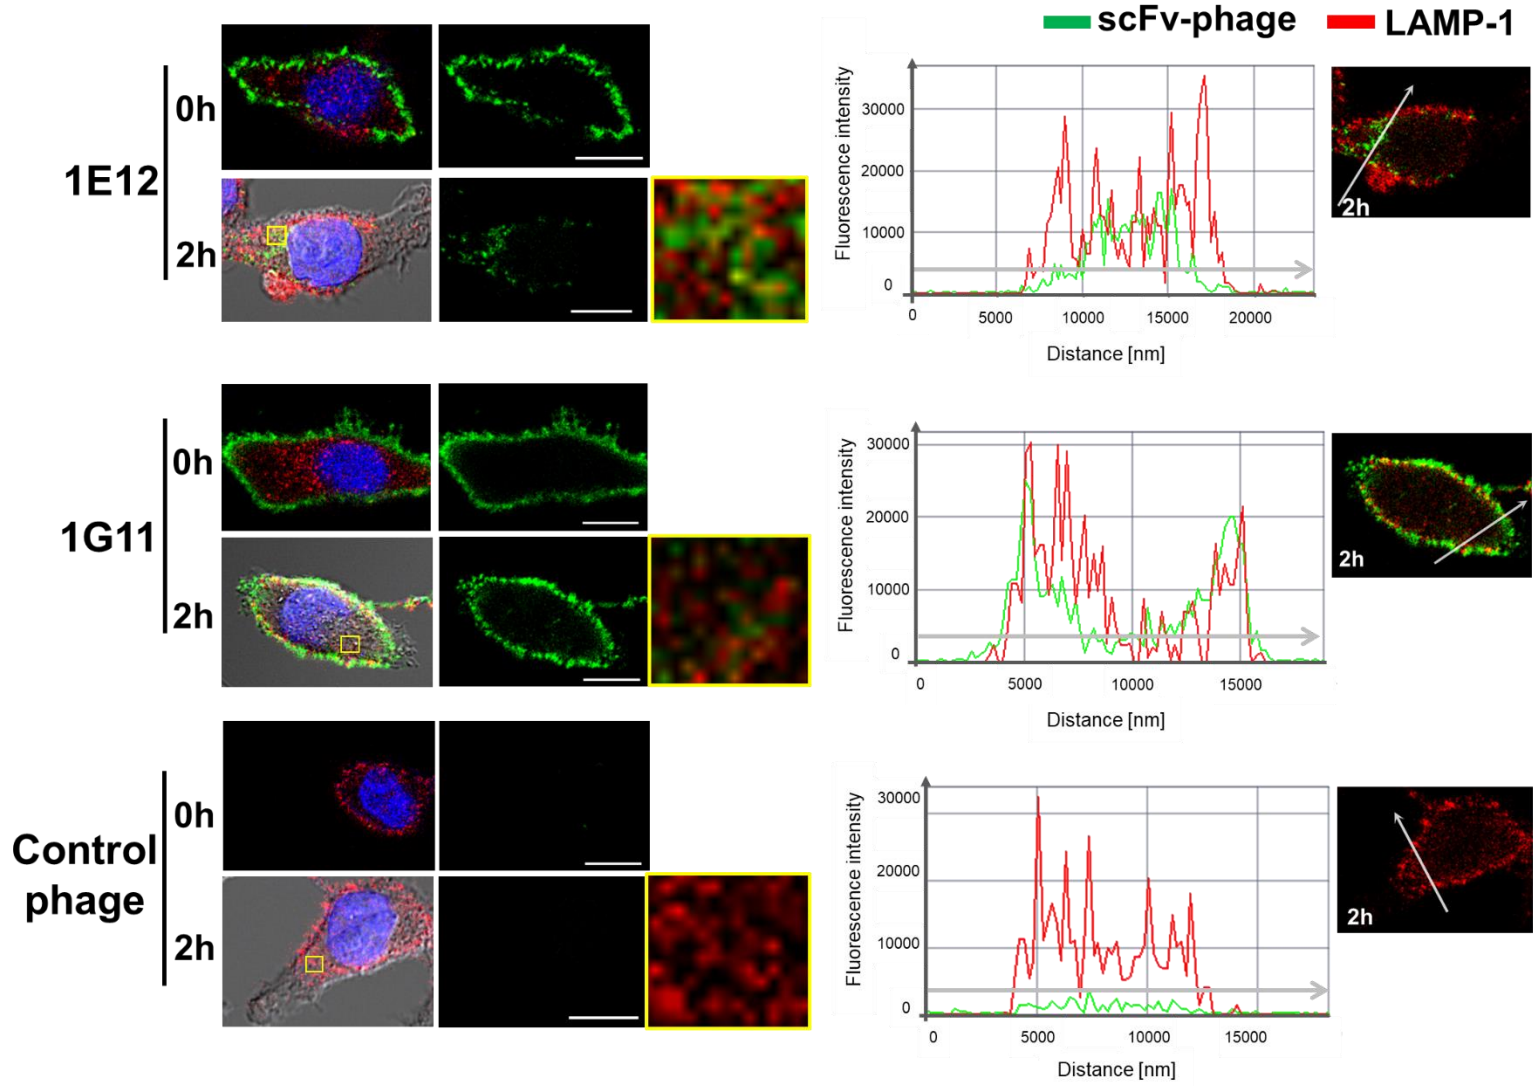



**B**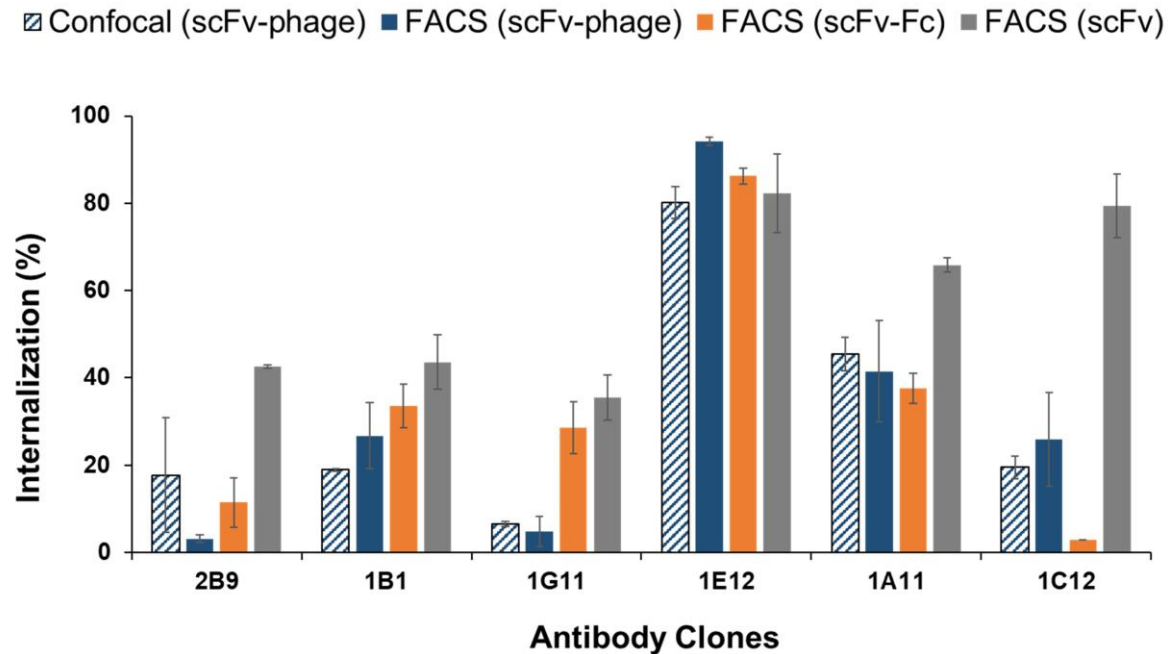

**Figure S7.** Co-localization and quantification of internalized scFv-phage. (A) Internalization and subcellular localization of scFv-phage into MDA-MB-453. Representative images of scFv-phage for 1E12 (HIG) and 1G11 (LIG) internalization analyzed by confocal microscopy (see Materials and Methods). The yellow boxed regions were magnified to visualize the co-localization of internalized scFv-phage (green) with LAMP-1 (red). The relative fluorescent intensity of antibody profiles was also analyzed to determine the co-localization of antibody with LAMP-1. Arbitrary lines were drawn across the single confocal section of interest (right panel). Then the fluorescence intensities along the drawn line were plotted for scFv-phage and LAMP-1. Overlapping fluorescent intensity from scFv-phage and LAMP-1 indicates the co-localization. Nuclei were labeled with DAPI (blue). All images were observed with Zeiss LSM 880 confocal microscope with objective 40x; scale bar, 10  $\mu$ m. (B) Comparison of internalization level of scFv-phage clones from the confocal microscopy-based experiments in Figure 6 (confocal) with the flow cytometry assay in Figure 4 (FACS). In the confocal microscopy, the membrane of cells was identified to distinguish the inside and outside area to calculate the ratio of the internalized scFv-phage taken up by the cells (see Materials and Methods). The percentage of internalized antibodies (% internalization) of FACS is derived from figure 4. The error bars represent SD and SEM for confocal microscopy and FACS, respectively.

**Table S1.** Statistical analysis of internalization and its significance for the unique antibody clones binding to CSC-like MDA-MB-453 cells in scFv-phage, scFv, and scFv-Fc format.

| Group | Clone | scFv-phage                       |                              | scFv                |                 | scFv-Fc             |                 |
|-------|-------|----------------------------------|------------------------------|---------------------|-----------------|---------------------|-----------------|
|       |       | internalization (%) <sup>1</sup> | <i>p</i> -value <sup>2</sup> | internalization (%) | <i>p</i> -value | internalization (%) | <i>p</i> -value |
| HIG   | 1E12  | 94.2 ± 0.9                       | <0.0001                      | 82.3 ± 9.0          | <0.0001         | 86.2 ± 1.9          | <0.0001         |
| HIG   | 2E1   | 92.5 ± 3.3                       | <0.0001                      | 60.8 ± 1.7          | <0.0001         | 95.7 ± 1.3          | <0.0001         |
| HIG   | 2E7   | 88.2 ± 1.7                       | <0.0001                      | 93.7 ± 1.8          | <0.0001         | 87.6 ± 2.0          | <0.0001         |
| HIG   | 1D2   | 70.0 ± 5.3                       | <0.0001                      | 88.4 ± 4.7          | <0.0001         | n.d. <sup>3</sup>   | n.d.            |
| MIG   | 2H7   | 60.5 ± 3.6                       | 0.0002                       | 70.8 ± 1.9          | 0.0039          | 74.4 ± 3.6          | <0.0001         |
| MIG   | 3C7   | 41.9 ± 8.3                       | 0.0008                       | 48.6 ± 2.6          | 0.0001          | 49.9 ± 6.8          | <0.0001         |
| MIG   | 1A11  | 41.5 ± 11.5                      | 0.0021                       | 65.8 ± 1.7          | 0.0003          | 37.6 ± 3.4          | <0.0001         |
| MIG   | 2H6   | 39.6 ± 5.3                       | 0.0007                       | 54.9 ± 5.3          | 0.0003          | 46.2 ± 4.1          | 0.0002          |
| MIG   | 1D5   | 35.4 ± 14.0                      | 0.0032                       | 46.5 ± 9.2          | 0.0007          | n.d.                | n.d.            |
| MIG   | 2E11  | 33.6 ± 2.2                       | 0.0002                       | 53.3 ± 3.1          | 0.0010          | 29.4 ± 6.5          | 0.0012          |
| MIG   | 3C3   | 33.0 ± 13.1                      | 0.0063                       | 82.9 ± 1.3          | 0.0004          | 38.0 ± 6.1          | 0.0005          |
| LIG   | 1B1   | 26.6 ± 7.6                       | 0.0023                       | 43.6 ± 6.2          | 0.0002          | 33.6 ± 5.0          | 0.0004          |
| LIG   | 1C12  | 25.9 ± 11                        | 0.0076                       | 79.3 ± 7.3          | <0.0001         | -12.2 ± 9.4         | 0.0347          |
| LIG   | 1G11  | 4.8 ± 3.5                        | 0.4132*                      | 35.5 ± 5.2          | 0.0001          | 28.6 ± 5.9          | 0.0013          |
| LIG   | 2B9   | 3.1 ± 0.8                        | 0.0302                       | 42.6 ± 0.3          | <0.0001         | 11.4 ± 5.6          | 0.0125          |

<sup>1</sup> Internalization in percent (mean ± SEM) are shown from at least two sets of independent experiments and four-nine independent experiments per antibody.

<sup>2</sup> The *p*-values are one-tailed Welch's *t*-test for the statistical significance of the difference between 0 and 90 min at 37 °C incubation (see Materials and Methods). The *p*-values of <0.05 were considered statistically significant.

<sup>3</sup> not determined

\**p*-value of 1G11 scFv-phage form is higher than 0.05, indicating its internalization into the cells at 90 min is insignificant.
